# Supplementary material for: Prospective validation of Canadian TIA Score and comparison with ABCD2 and ABCD2i for subsequent stroke risk after transient ischaemic attack: multicentre prospective cohort study
Source: PubMed Central journal article supplement — BMJ. 2021 Feb 4;372:n49. doi: 10.1136/bmj.n49 (PMC7859838; doi:10.1136/bmj.n49), 2021-02-04
Supplement: perj061823.ww1.pdf [file perj061823.ww1.pdf]

**Supplemental Material****Appendix 1. Study Enrolment**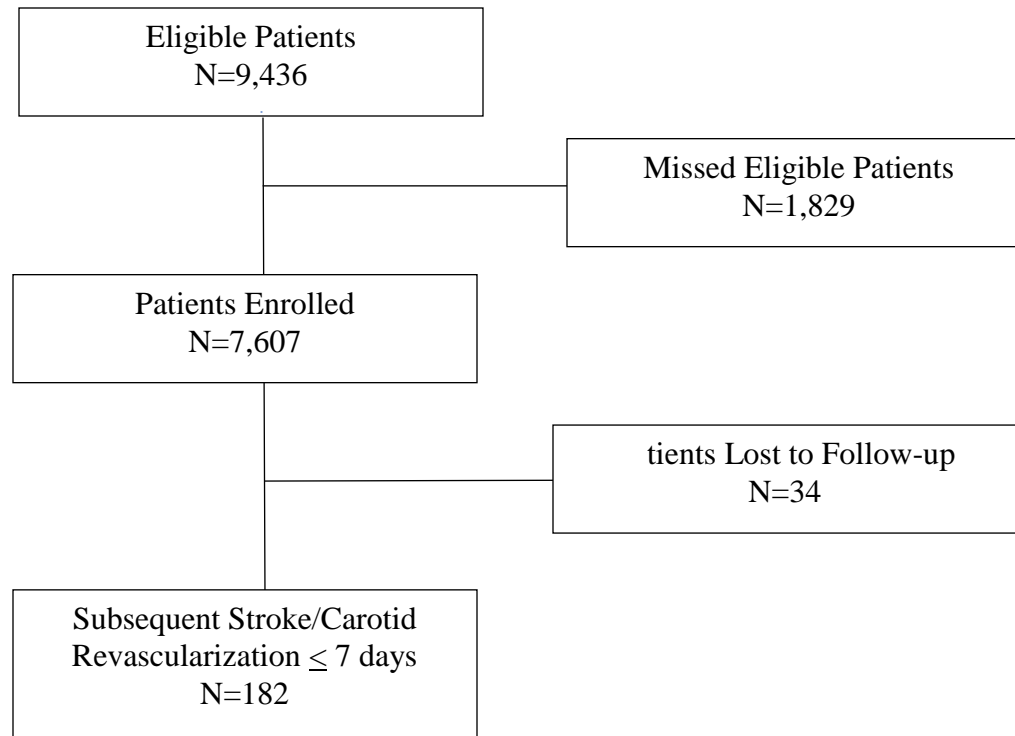

## Appendix 2: Outcomes of Canadian TIA Score Using 2, 7, 30, and 90 Day Outcomes

| TIA Score                                          | N     | Outcomes | Observed Risk | C-statistic (95% CI) |
|----------------------------------------------------|-------|----------|---------------|----------------------|
| <b>Subsequent Stroke <math>\leq 2</math> days</b>  |       |          |               |                      |
| Low Risk (-3 to 3)                                 | 1,242 | 1        | 0.1%          | 0.69 (0.64 – 0.75)   |
| Medium Risk (4 to 8)                               | 5,484 | 51       | 0.9%          |                      |
| High Risk ( $\geq 9$ )                             | 881   | 18       | 2.0%          |                      |
| <b>Subsequent Stroke <math>\leq 7</math> days</b>  |       |          |               |                      |
| Low Risk (-3 to 3)                                 | 1,242 | 3        | 0.2%          | 0.67 (0.62 – 0.71)   |
| Medium Risk (4 to 8)                               | 5,484 | 81       | 1.5%          |                      |
| High Risk ( $\geq 9$ )                             | 881   | 24       | 2.7%          |                      |
| <b>Subsequent Stroke <math>\leq 90</math> days</b> |       |          |               |                      |
| Low Risk (-3 to 3)                                 | 1,242 | 5        | 0.4%          | 0.67 (0.63 – 0.70)   |
| Medium Risk (4 to 8)                               | 5,484 | 141      | 2.6%          |                      |
| High Risk ( $\geq 9$ )                             | 881   | 46       | 5.2%          |                      |

| TIA Score                                                                       | N     | Outcomes | Observed Risk | C-statistic (95% CI) |
|---------------------------------------------------------------------------------|-------|----------|---------------|----------------------|
| <b>Subsequent Stroke or Carotid Revascularization <math>\leq 2</math> days</b>  |       |          |               |                      |
| Low Risk (-3 to 3)                                                              | 1,242 | 1        | 0.1%          | 0.71 (0.66 – 0.76)   |
| Medium Risk (4 to 8)                                                            | 5,484 | 63       | 1.1%          |                      |
| High Risk ( $\geq 9$ )                                                          | 881   | 26       | 3.0%          |                      |
| <b>Subsequent Stroke or Carotid Revascularization <math>\leq 7</math> days</b>  |       |          |               |                      |
| Low Risk (-3 to 3)                                                              | 1,242 | 6        | 0.5%          | 0.70 (0.66 – 0.73)   |
| Medium Risk (4 to 8)                                                            | 5,484 | 124      | 2.3%          |                      |
| High Risk ( $\geq 9$ )                                                          | 881   | 53       | 6.0%          |                      |
| <b>Subsequent Stroke or Carotid Revascularization <math>\leq 90</math> days</b> |       |          |               |                      |
| Low Risk (-3 to 3)                                                              | 1,242 | 17       | 1.4%          | 0.68 (0.65 – 0.71)   |
| Medium Risk (4 to 8)                                                            | 5,484 | 224      | 4.1%          |                      |
| High Risk ( $\geq 9$ )                                                          | 881   | 90       | 10.2%         |                      |

### Appendix 3. ABCD2 Classification for Subsequent Stroke or CEA/CAS <7 Days

#### Subsequent Stroke or CEA/CAS $\leq 7$ days

| ABCD2    | Total Patients |       | Estimated Risk |      | Observed Risk |      | Risk Category | % of Patients | Sensitivity 95% CI |      |      | Specificity 95% CI |      |      |
|----------|----------------|-------|----------------|------|---------------|------|---------------|---------------|--------------------|------|------|--------------------|------|------|
|          | N              | %     | N              | %    | N             | %    |               |               |                    |      |      |                    |      |      |
| <b>0</b> | 114            | 1.5%  | 1              | 0.9% | 2             | 1.8% | Medium        | 93.0%         | 1.00               | 0.98 | 1.00 | --                 | --   | --   |
| <b>1</b> | 540            | 7.1%  | 6              | 1.2% | 6             | 1.1% |               |               | 0.99               | 0.96 | 1.00 | 0.02               | 0.01 | 0.02 |
| <b>2</b> | 1,591          | 20.9% | 25             | 1.6% | 33            | 2.1% |               |               | 0.96               | 0.92 | 0.98 | 0.09               | 0.08 | 0.09 |
| <b>3</b> | 2,197          | 28.9% | 45             | 2.1% | 42            | 1.9% |               |               | 0.77               | 0.71 | 0.83 | 0.30               | 0.29 | 0.31 |
| <b>4</b> | 1,827          | 24.0% | 50             | 2.7% | 37            | 2.0% |               |               | 0.54               | 0.47 | 0.62 | 0.59               | 0.58 | 0.60 |
| <b>5</b> | 805            | 10.6% | 29             | 3.6% | 29            | 3.6% |               |               | 0.34               | 0.27 | 0.41 | 0.83               | 0.82 | 0.84 |
| <b>6</b> | 432            | 5.7%  | 20             | 4.7% | 24            | 5.6% | High          | 7.0%          | 0.18               | 0.13 | 0.25 | 0.93               | 0.93 | 0.94 |
| <b>7</b> | 101            | 1.3%  | 6              | 6.1% | 9             | 8.9% |               |               | 0.05               | 0.02 | 0.09 | 0.99               | 0.98 | 0.99 |

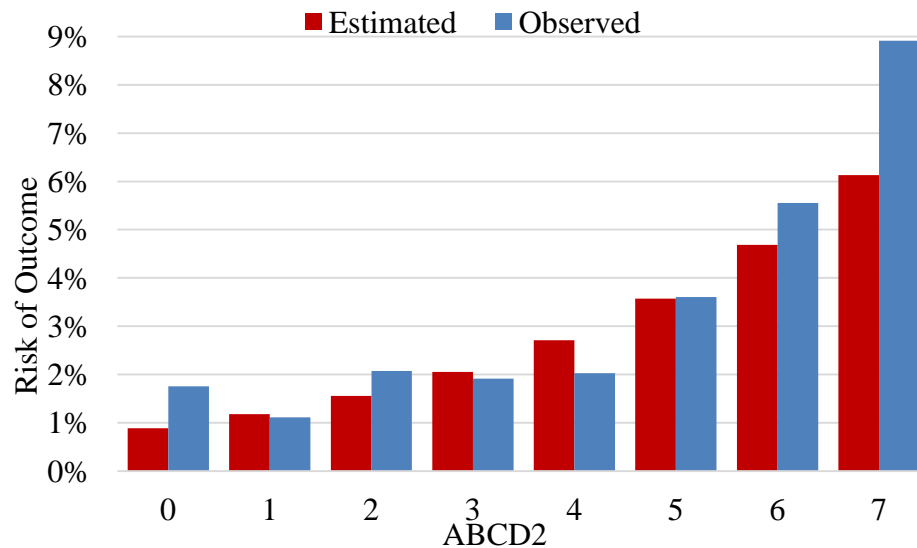

Subsequent Stroke  $\leq 7$  days

| ABCD2    | Total Patients |       | Estimated Risk |      | Observed Risk |      | Risk Category | % of Patients | Sensitivity 95% CI |      |      | Specificity 95% CI |      |      |
|----------|----------------|-------|----------------|------|---------------|------|---------------|---------------|--------------------|------|------|--------------------|------|------|
|          | N              | %     | N              | %    | N             | %    |               |               |                    |      |      |                    |      |      |
| <b>0</b> | 114            | 1.5%  | 0              | 0.3% | 0             | 0.0% | Low           | 8.6%          | 1.00               | 0.97 | 1.00 | --                 | --   | --   |
| <b>1</b> | 540            | 7.1%  | 3              | 0.5% | 2             | 0.4% |               |               | 1.00               | 0.97 | 1.00 | 0.02               | 0.01 | 0.02 |
| <b>2</b> | 1,591          | 20.9% | 12             | 0.8% | 16            | 1.0% | Medium        | 90.1%         | 0.98               | 0.93 | 1.00 | 0.87               | 0.08 | 0.09 |
| <b>3</b> | 2,197          | 28.9% | 24             | 1.1% | 24            | 1.1% |               |               | 0.83               | 0.75 | 0.90 | 0.30               | 0.29 | 0.31 |
| <b>4</b> | 1,827          | 24.0% | 30             | 1.6% | 26            | 1.4% |               |               | 0.61               | 0.51 | 0.70 | 0.59               | 0.58 | 0.60 |
| <b>5</b> | 805            | 10.6% | 19             | 2.4% | 18            | 2.2% |               |               | 0.37               | 0.28 | 0.47 | 0.83               | 0.82 | 0.84 |
| <b>6</b> | 432            | 5.7%  | 15             | 3.5% | 16            | 3.7% |               |               | 0.20               | 0.13 | 0.29 | 0.93               | 0.93 | 0.94 |
| <b>7</b> | 101            | 1.3%  | 5              | 5.0% | 6             | 5.9% | High          | 1.3%          | 0.06               | 0.02 | 0.12 | 0.99               | 0.98 | 0.99 |

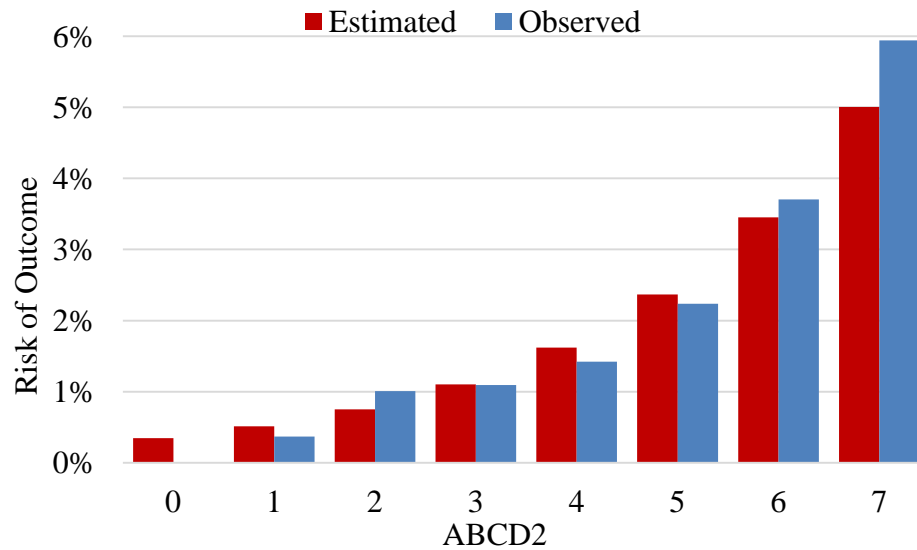

| ABCD2                                                                         | Outcome |       | iLR (95%CI)      | Observed Risk | Estimated Risk |
|-------------------------------------------------------------------------------|---------|-------|------------------|---------------|----------------|
|                                                                               | Yes     | No    |                  |               |                |
| <b>Subsequent Stroke or Carotid Revascularization <math>\leq</math>7 days</b> |         |       |                  |               |                |
| <b>Low Risk ( N/A )</b>                                                       | 0       | 0     | --               | --            | --             |
| <b>Medium Risk (0 to 5)</b>                                                   | 149     | 6,925 | 0.88 (0.82-0.94) | 2.1%          | 2.2%           |
| <b>High Risk (<math>\geq</math>6)</b>                                         | 33      | 500   | 2.69 (1.96-3.71) | 6.2%          | 5.0%           |
| <b>Subsequent Stroke <math>\leq</math>7 days</b>                              |         |       |                  |               |                |
| <b>Low Risk (0 to 1)</b>                                                      | 2       | 652   | 0.21 (0.05-0.84) | 0.3%          | 0.5%           |
| <b>Medium Risk (2 to 6)</b>                                                   | 100     | 6,752 | 1.03 (0.97-1.09) | 1.5%          | 1.5%           |
| <b>High Risk (<math>\geq</math>7)</b>                                         | 6       | 95    | 4.39 (1.96-9.79) | 5.9%          | 5.0%           |

#### Appendix 4. ABCD2i Classification for Subsequent Stroke or CEA/CAS <7 Days

##### Subsequent Stroke or CEA/CAS $\leq 7$ days

| ABCD2i    | Total Patients |       | Estimated Risk |      | Observed Risk |       | Risk Category | % of Patients | Sensitivity 95% CI |      |      | Specificity 95% CI |      |      |
|-----------|----------------|-------|----------------|------|---------------|-------|---------------|---------------|--------------------|------|------|--------------------|------|------|
|           | N              | %     | N              | %    | N             | %     |               |               |                    |      |      |                    |      |      |
| <b>0</b>  | 102            | 1.3%  | 1              | 0.8% | 1             | 1.0%  | Medium        | 96.7%         | 1.00               | 0.98 | 1.00 | --                 | --   | --   |
| <b>1</b>  | 454            | 6.0%  | 5              | 1.0% | 5             | 1.1%  |               |               | 0.99               | 0.97 | 1.00 | 0.01               | 0.01 | 0.02 |
| <b>2</b>  | 1,288          | 16.9% | 16             | 1.3% | 23            | 1.8%  |               |               | 0.97               | 0.93 | 0.99 | 0.07               | 0.07 | 0.08 |
| <b>3</b>  | 1,633          | 21.5% | 26             | 1.6% | 25            | 1.5%  |               |               | 0.84               | 0.78 | 0.89 | 0.24               | 0.23 | 0.25 |
| <b>4</b>  | 1,360          | 17.9% | 28             | 2.1% | 21            | 1.5%  |               |               | 0.70               | 0.63 | 0.77 | 0.46               | 0.45 | 0.47 |
| <b>5</b>  | 808            | 10.6% | 21             | 2.6% | 26            | 3.2%  |               |               | 0.59               | 0.51 | 0.66 | 0.64               | 0.63 | 0.65 |
| <b>6</b>  | 813            | 10.7% | 27             | 3.3% | 24            | 3.0%  |               |               | 0.45               | 0.37 | 0.52 | 0.75               | 0.74 | 0.76 |
| <b>7</b>  | 599            | 7.9%  | 25             | 4.2% | 18            | 3.0%  |               |               | 0.31               | 0.25 | 0.39 | 0.85               | 0.84 | 0.86 |
| <b>8</b>  | 300            | 3.9%  | 16             | 5.2% | 13            | 4.3%  |               |               | 0.21               | 0.16 | 0.28 | 0.93               | 0.93 | 0.94 |
| <b>9</b>  | 195            | 2.6%  | 13             | 6.6% | 18            | 9.2%  | High          | 3.3%          | 0.14               | 0.10 | 0.20 | 0.97               | 0.97 | 0.97 |
| <b>10</b> | 55             | 0.7%  | 5              | 8.3% | 8             | 14.5% |               |               | 0.04               | 0.02 | 0.08 | 0.99               | 0.99 | 1.00 |

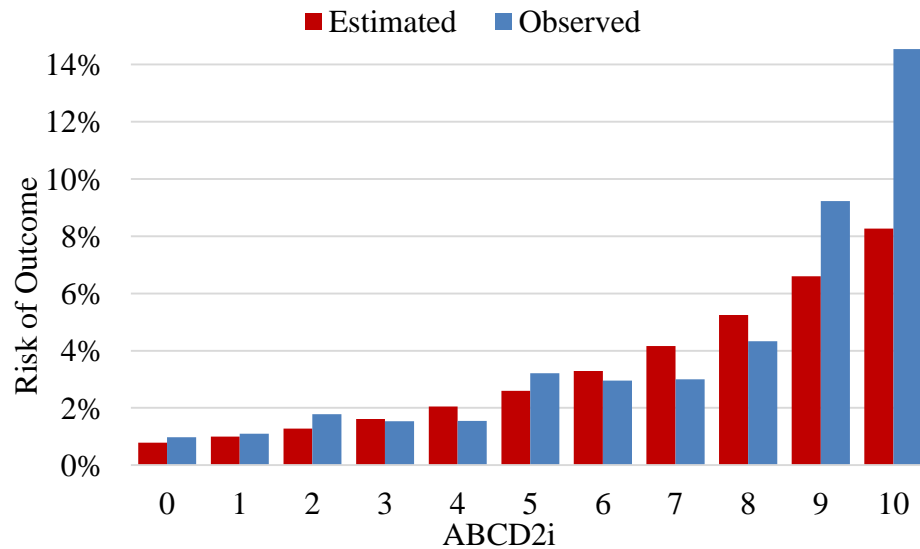

Subsequent Stroke  $\leq 7$  days

| ABCD2i    | Total Patients |       | Estimated Risk |      | Observed Risk |      | Risk Category | % of Patients | Sensitivity 95% CI |      |      | Specificity 95% CI |      |      |
|-----------|----------------|-------|----------------|------|---------------|------|---------------|---------------|--------------------|------|------|--------------------|------|------|
|           | N              | %     | N              | %    | N             | %    |               |               |                    |      |      |                    |      |      |
| <b>0</b>  | 102            | 1.3%  | 0              | 0.3% | 0             | 0.0% | Low           | 45.7%         | 1.00               | 0.97 | 1.00 | --                 | --   | --   |
| <b>1</b>  | 454            | 6.0%  | 2              | 0.4% | 2             | 0.4% |               |               | 1.00               | 0.97 | 1.00 | 0.01               | 0.01 | 0.02 |
| <b>2</b>  | 1,288          | 16.9% | 8              | 0.6% | 11            | 0.9% |               |               | 0.98               | 0.93 | 1.00 | 0.07               | 0.07 | 0.08 |
| <b>3</b>  | 1,633          | 21.5% | 13             | 0.8% | 13            | 0.8% |               |               | 0.88               | 0.80 | 0.93 | 0.24               | 0.23 | 0.25 |
| <b>4</b>  | 1,360          | 17.9% | 15             | 1.1% | 14            | 1.0% | Medium        | 51.0%         | 0.76               | 0.67 | 0.84 | 0.46               | 0.45 | 0.47 |
| <b>5</b>  | 808            | 10.6% | 12             | 1.5% | 14            | 1.7% |               |               | 0.63               | 0.53 | 0.72 | 0.64               | 0.63 | 0.65 |
| <b>6</b>  | 813            | 10.7% | 16             | 2.0% | 14            | 1.7% |               |               | 0.50               | 0.40 | 0.60 | 0.75               | 0.74 | 0.76 |
| <b>7</b>  | 599            | 7.9%  | 16             | 2.7% | 13            | 2.2% |               |               | 0.37               | 0.28 | 0.47 | 0.85               | 0.84 | 0.86 |
| <b>8</b>  | 300            | 3.9%  | 11             | 3.7% | 9             | 3.0% |               |               | 0.25               | 0.17 | 0.34 | 0.93               | 0.92 | 0.94 |
| <b>9</b>  | 195            | 2.6%  | 10             | 4.9% | 13            | 6.7% | High          | 3.3%          | 0.17               | 0.10 | 0.25 | 0.97               | 0.96 | 0.97 |
| <b>10</b> | 55             | 0.7%  | 4              | 6.5% | 5             | 9.1% |               |               | 0.05               | 0.02 | 0.10 | 0.99               | 0.99 | 1.00 |

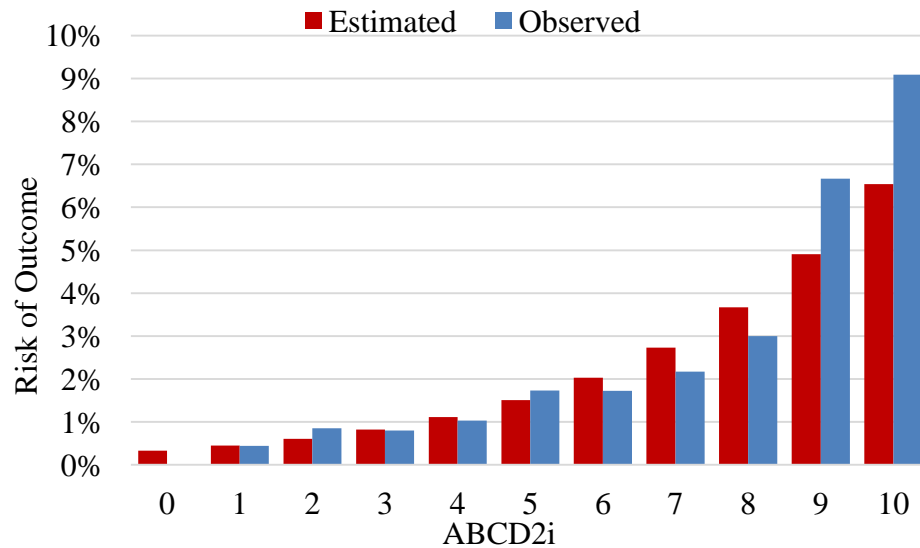

| ABCD2i                                                                        | Outcome |       | iLR (95%CI)      | Observed Risk | Estimated Risk |
|-------------------------------------------------------------------------------|---------|-------|------------------|---------------|----------------|
|                                                                               | Yes     | No    |                  |               |                |
| <b>Subsequent Stroke or Carotid Revascularization <math>\leq</math>7 days</b> |         |       |                  |               |                |
| <b>Low Risk ( N/A )</b>                                                       | 0       | 0     | --               | --            | --             |
| <b>Medium Risk (0 to 8)</b>                                                   | 156     | 7,201 | 0.88 (0.83-0.94) | 2.1%          | 2.2%           |
| <b>High Risk (<math>\geq</math>9)</b>                                         | 26      | 224   | 4.74 (3.24-6.91) | 10.4%         | 7.0%           |
| <b>Subsequent Stroke <math>\leq</math>7 days</b>                              |         |       |                  |               |                |
| <b>Low Risk (0 to 3)</b>                                                      | 26      | 3,451 | 0.52 (0.37-0.73) | 0.7%          | 0.7%           |
| <b>Medium Risk (4 to 8)</b>                                                   | 64      | 3,816 | 1.16 (0.99-1.36) | 1.6%          | 1.8%           |
| <b>High Risk (<math>\geq</math>9)</b>                                         | 18      | 232   | 5.39 (3.47-8.37) | 7.2%          | 5.3%           |
